# Supplementary material for: The regulatory ancestral network of surgical meshes
Source: PubMed Central journal article supplement (PMC6007828; doi:10.1371/journal.pone.0197883), 2018-06-19
Supplement: pone.0197883.s001.pdf [file pone.0197883.s001.pdf]

| Name                                                                   | Manufacturer                                       | knumber | Date |
|------------------------------------------------------------------------|----------------------------------------------------|---------|------|
| DESARA SL                                                              | CALDERA MEDICAL INC.                               | K121928 | 2013 |
| COLLAGEN TENDON SHEET-D                                                | ROTATION MEDICAL INC.                              | K122048 | 2013 |
| VERTESSA LITE 10 X20CM VERTESSA LITE 11 X 30CM VERTESSA LITE 11 X 30CM | CALDERA MEDICAL INC.                               | K123028 | 2013 |
| SERI SURGICAL SCAFFOLD                                                 | ALLERGAN                                           | K123128 | 2013 |
| VERTESSA LITE 10 X 20CM VERTESSA LITE 11 X 30CM                        | CALDERA MEDICAL                                    | K123337 | 2013 |
| FORTIVA PORCINE DERMIS                                                 | RTI BIOLOGICS INC.                                 | K123356 | 2013 |
| RESTORELLE Y CONTOUR                                                   | COLOPLAST A/S                                      | K123914 | 2013 |
| BIODESIGN SURGISIS ANTERIOR POSTERIOR PELVIC FLOOR                     | COOK BIOTECH INCORPORATED                          | K130006 | 2013 |
| ENDOFAST RELIANT SCP ENDOFAST RELIANT LAP                              | IBI ISRAEL BIOMEDICAL INNOVATIONS LTD.             | K130059 | 2013 |
| COVAMESH                                                               | BIOMUP S.A.                                        | K130428 | 2013 |
| ENDOFORM RECONSTRUCTIVE TEMPLATE                                       | MESYNTH LTD                                        | K130547 | 2013 |
| LTN - LAPAROSCOPIC SURGICAL MESH                                       | LIFECCELL CORP.                                    | K130817 | 2013 |
| AIGIS RX R PM/ AIGIS RX R ICD                                          | TYRX INC.                                          | K130943 | 2013 |
| VENTRALIGHT ST MESH WITH ECHO PS POSITIONING SYSTEM                    | C.R. BARD INC.                                     | K130968 | 2013 |
| NEOVEIL                                                                | GUNZE LIMITED                                      | K130997 | 2013 |
| AIGIS RX N MEDIUM; AIGIS RX N LARGE                                    | TYRX INC                                           | K131007 | 2013 |
| TRELLIS COLLAGEN RIBBON                                                | WRIGHT MEDICAL TECHNOLOGY INC.                     | K131143 | 2013 |
| SPARC SYSTEM AND MONARC MONARC AND MONARC C SYSTEM                     | AMERICAN MEDICAL SYSTEMS                           | K131229 | 2013 |
| DYNAMESH -CICAT                                                        | FEG TEXTILTECHNIK FORSCHUNGS-UND ENTWICKLUNGSGESEL | K131530 | 2013 |
| GORE SEAMGUARD REINFORCEMENT                                           | W. L. GORE & ASSOCIATES INC.                       | K131658 | 2013 |
| SYMBOTEX(TM) COMPOSITE MESH                                            | SOFRADIM PRODUCTION                                | K131969 | 2013 |
| MESO BILAYER SURGICAL MESH                                             | KENSEY NASH CORPORATION DBA DSM BIOMEDICAL         | K132025 | 2013 |
| GYNECARE TVT EXACT CONTINENCE SYSTEM                                   | ETHICON INC.                                       | K132054 | 2013 |
| RESTORELLE M RESTORELLE XL                                             | COLOPLAST CORP.                                    | K132061 | 2013 |
| DESARA MESH DESARA BLUE                                                | CALDERA MEDICAL INC.                               | K132069 | 2013 |
| BARD VENTRALEX HERNIA PATCH                                            | C.R. BARD INC.                                     | K132441 | 2013 |
| RETROARC RETROPUBIC SLING SYSTEM                                       | AMERICAN MEDICAL SYSTEMS INC.                      | K132655 | 2013 |
| AIGIS RX N (MEDIUM) AIGIS RX N (LARGE)                                 | TYRX INC.                                          | K132699 | 2013 |
| MESO TENDON MATRIX                                                     | KENSEY NASH CORPORATION DBA DSM BIOMEDICAL         | K133169 | 2013 |
| AVANCEÂ® FOAM ABDOMINAL DRESSING KIT                                   | MOLNLYCKE HEALTHCARE                               | K130852 | 2014 |
| DIAPHRAGMATIC HERNIA GRAFT                                             | COOK BIOTECH INC.                                  | K133011 | 2014 |
| ULTRAPRO COMFORT PLUG                                                  | ETHICON INC.                                       | K133198 | 2014 |
| XENMATRIX AB SURGICAL GRAFT                                            | C.R. BARD INC.                                     | K133223 | 2014 |
| SIS HERNIA GRAFT                                                       | COOK BIOTECH INC.                                  | K133306 | 2014 |
| PREMIUM                                                                | COUSIN BIOTECH S.A.S.                              | K133889 | 2014 |
| MIROMATRIX BIOLOGICAL MESH                                             | MIROMATRIX MEDICAL INC.                            | K134033 | 2014 |
| RESTORELLE Y CONTOUR MESH                                              | COLOPLAST A/S                                      | K140116 | 2014 |
| COLLAGEN TENDON SHEET-DDI (CTS-DDI)                                    | ROTATION MEDICAL INC.                              | K140300 | 2014 |
| CORMATRIX PROTECT ECM ENVELOPE                                         | CORMATRIX CARDIOVASCULAR INC.                      | K140306 | 2014 |
| XENMATRIX SURGICAL GRAFT                                               | C.R. BARD                                          | K140501 | 2014 |
| DESARA BLUE OV DESARA BLUE SS                                          | CALDERA MEDICAL                                    | K140843 | 2014 |
| PROGRIP SELF-GRIPPING POLYPROPYLENE MESH PARIETEN                      | SOFRADIM PRODUCTION                                | K140941 | 2014 |
| FREEDOM INGUINAL HERNIA REPAIR IMPLANT-25MM/40MM                       | Insightra Medical                                  | K140967 | 2014 |
| OVINE TISSUE MATRIX(OTM)                                               | TELA BIO INC.                                      | K141053 | 2014 |
| X-REPAIR                                                               | SYNTHASOME                                         | K141394 | 2014 |
| X-REPAIRSL                                                             | SYNTHASOME INC.                                    | K141499 | 2014 |

|                                                                                                                                                                          |                              |         |      |
|--------------------------------------------------------------------------------------------------------------------------------------------------------------------------|------------------------------|---------|------|
| ETHICON PHYSIOMESH OPEN FLEXIBLE COMPOSITE MESH                                                                                                                          | ETHICON INC.                 | K141560 | 2014 |
| BOVINE PERICARDIUM PATCH                                                                                                                                                 | COLLAFIRM LLC                | K141721 | 2014 |
| FORTIVA PORCINE DERMIS TUTOPLAST PORCINE DERMIS                                                                                                                          | RTI SURGICAL INC.            | K142070 | 2014 |
| PARIETENE MACROPOROUS MESH                                                                                                                                               | SOFRADIM PRODUCTION          | K142091 | 2014 |
| HP Tissue Matrix                                                                                                                                                         | LifeCell Corporation         | K142326 | 2014 |
| TYRX Neuro Absorbable Antibacterial Envelope                                                                                                                             | MEDTRONIC TYRX INC.          | K142611 | 2014 |
| Polyester Mesh)<br>Parietex Plug and Patch (new name : Parietex Plug and Patch System)                                                                                   |                              |         |      |
| Progrip Laparoscopic Self-Fixating Mesh                                                                                                                                  | SOFRADIM PRODUCTION          | K142900 | 2014 |
| Parietex Lightweight Mesh)<br>Parietex Composite Mono PM Mesh (new name: Parietex Composite Parastomal Mesh)<br>Parietex Composite Ventral Patch Symbotex Composite Mesh | SOFRADIM PRODUCTION          | K142908 | 2014 |
| Matristem Surgery Matrix RS PSM PSMX Matristem Pelvic F                                                                                                                  | ACELL INC                    | K141084 | 2015 |
| Insightra Freedom Ventral Hernia Repair System                                                                                                                           | Insightra Medical            | K142192 | 2015 |
| Modified ONFLEX Mesh                                                                                                                                                     | C.R. Bard Inc.               | K142706 | 2015 |
| ONFLEX Mesh                                                                                                                                                              | C.R. Bard Inc.               | K142711 | 2015 |
| SIS Inguinal Hernia Repair Graft                                                                                                                                         | COOK BIOTECH INCORPRATED     | K142887 | 2015 |
| Device<br>RENASYSÂç AB Abdominal Dressing Kit with Soft Port                                                                                                             | SMITH & NEPHEW INC.          | K143133 | 2015 |
| Phasix ST Mesh                                                                                                                                                           | C. R. Bard Inc               | K143380 | 2015 |
| Progrip Laparoscopic Self-Fixating Mesh                                                                                                                                  | SOFRADIM PRODUCTION          | K143386 | 2015 |
| ECHO 2.0 LAP SYSTEM with VENTRALIGHT ST MESH                                                                                                                             | C.R. Bard Inc.               | K143743 | 2015 |
| Vertessa Lite                                                                                                                                                            | CALDERA MEDICAL INC.         | K150016 | 2015 |
| Vertessa Lite Y-Mesh                                                                                                                                                     | CALDERA MEDICAL INC.         | K150023 | 2015 |
| Versatex Monofilament Mesh                                                                                                                                               | SOFRADIM PRODUCTION          | K150091 | 2015 |
| TYRX Neuro Absorbable Antibacterial Envelope                                                                                                                             | MEDTRONIC TYRX INC.          | K150291 | 2015 |
| Miromatrix Biological Mesh RS                                                                                                                                            | MIROMATRIX MEDICAL INC.      | K150341 | 2015 |
| GORE SEAMGUARD Reinforcement                                                                                                                                             | W. L. GORE & ASSOCIATES INC. | K150551 | 2015 |
| Biodesign Enterocutaneous Fistula Plug                                                                                                                                   | COOK BIOTECH INCORPRATED     | K150668 | 2015 |
| LTM-Perforated Surgical Mesh                                                                                                                                             | LifeCell Corporation         | K150712 | 2015 |
| ULTRAPRO ADVANCED Macroporous Partically Absorbable M                                                                                                                    | ETHICON INC.                 | K150906 | 2015 |
| XenMatrix AB Surgical Graft                                                                                                                                              | C.R. Bard                    | K151177 | 2015 |
| C-QUR C-QUR FX C-QUR TacShield C-QUR V-Patch C-QUR Ce                                                                                                                    | ATRIUM MEDICAL CORPORATION   | K151386 | 2015 |
| ProLite Mesh ProLite Ultra Mesh ProLoop Mesh Plug                                                                                                                        | ATRIUM MEDICAL CORPORATION   | K151437 | 2015 |
| GORE SYNECOR Biomaterial                                                                                                                                                 | W.L GORE & ASSOCIATES INC.   | K152609 | 2015 |
| TYRX Neuro Antibacterial Envelope                                                                                                                                        | TYRX INC.                    | K152678 | 2015 |
